# Supplementary material
Source: PubMed Central journal article supplement (PMC4731129)
Supplement: ASN.2015030302_ASN2015030302SupplementaryData.pdf [file ASN.2015030302_ASN2015030302SupplementaryData.pdf]

## Supplemental Figure 1.

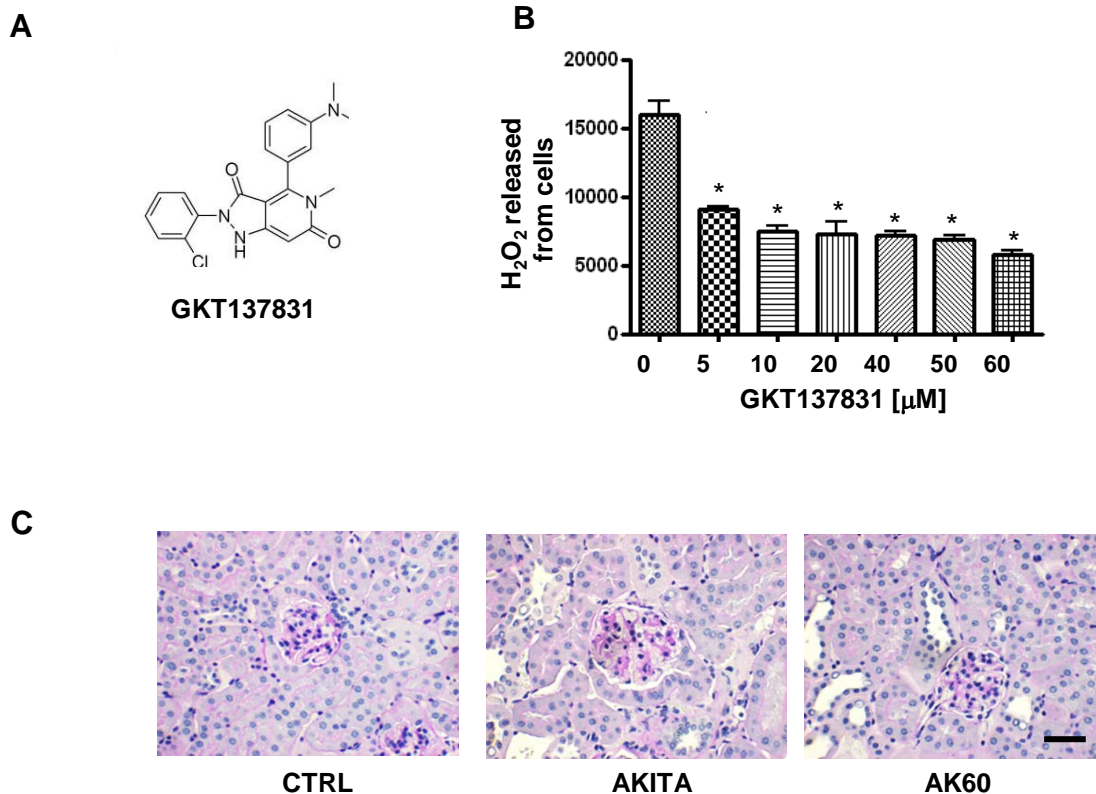

## Supplemental Figure 1.

NOX4 inhibitor GKT137831 in rtTA-293 cells expressing NOX4 and F1 Akita diabetic mice. (A) Chemical structure of GKT137831. (B) Cellular  $\text{H}_2\text{O}_2$  levels in rtTA-293 cells stably expressing HA-NOX4 with the indicated concentration GKT137831 for 4h after 2  $\mu\text{g/ml}$  doxycycline for 24 h. (C) PAS staining of F1 control mice treated with vehicle (CTRL), F1 Akita mice treated with vehicle (AKITA) or 60mg/kg/day GKT137831 (AK60). Scale bar, 50  $\mu\text{m}$ .

## Supplemental Figure 2.

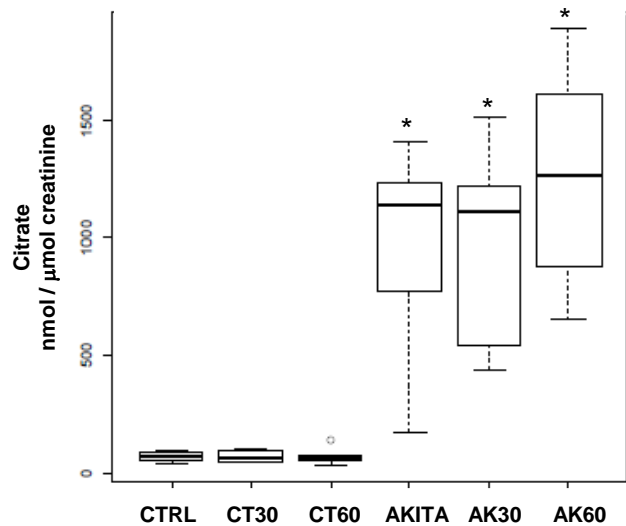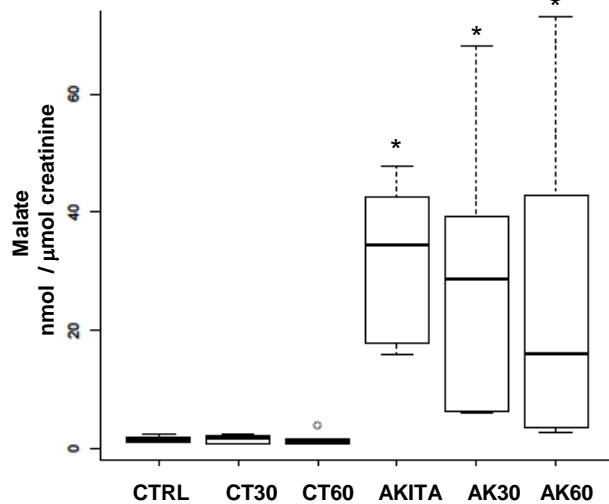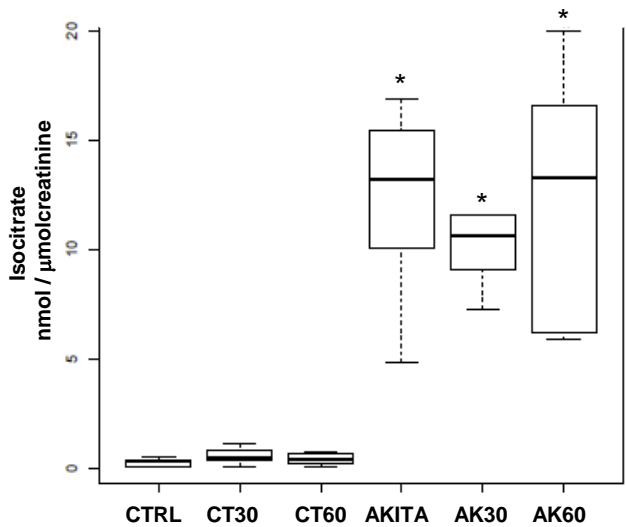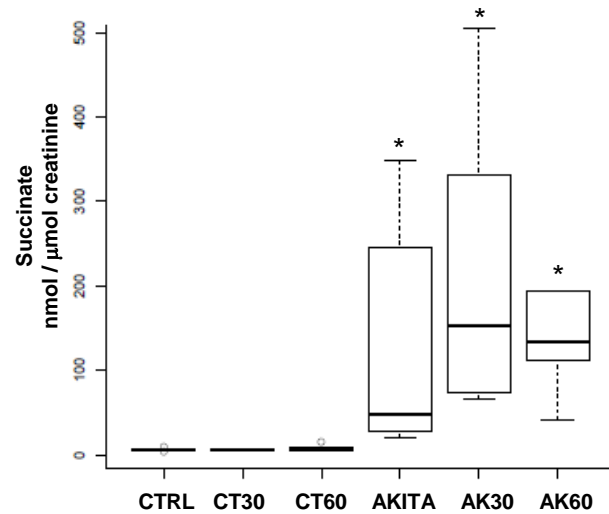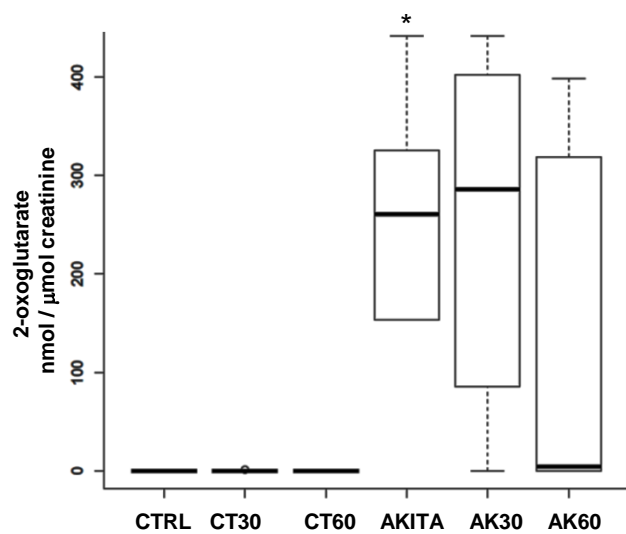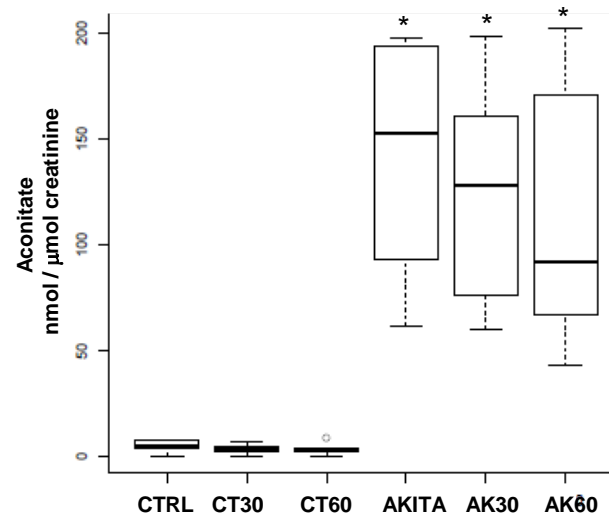

## Supplemental Figure 2.

Box-plots of metabolite analysis in F1 Akita diabetic urine after 16 weeks treatment with NOX4 inhibitor, GKT137831. TCA cycle intermediates such as citrate, malate, Isocitrate, succinate, 2-oxoglutarate and aconitate increased in the diabetic F1 Akita mice compared with the control mice, however they did not significantly reduce with the NOX1/4 inhibitor in a dose-dependent manner. F1 control mice treated with vehicle (CTRL), 30mg/kg/day (CT30), or 60mg/kg/day GKT137831 (CT60), F1 Akita diabetic mice treated with vehicle (AKITA), 30mg/kg/day (AK30), or 60mg/kg/day GKT137831 (AK60). Metabolite level is expressed as nmole metabolite/ $\mu$ mole creatinine.  $n=5-6$  per group,  $*P < 0.05$  vs. F1 controls, lines: median.

## Supplemental Table 1

Physiological characteristics of podocyte specific NOX4Tg mice after doxycycline treatment for 5 weeks.

| Mice    | Treatment<br>Doxycycline | Number | Body<br>Weight (g) | Blood Glucose<br>(mg/dl) | Kidney /BW<br>% |
|---------|--------------------------|--------|--------------------|--------------------------|-----------------|
| Control | 5 weeks                  | 7      | 27.73±7.70         | 157.2±0.5                | 0.82±0.09       |
| NOX4 TG | 5 weeks                  | 8      | 29.88±6.62         | 194.8±31.6               | 0.88±0.05       |

## Supplemental Table 2

### Primers and Probes for real time q PCR

| Primer Name          | Forward                          | Reverse                           | Probe                                       |
|----------------------|----------------------------------|-----------------------------------|---------------------------------------------|
| Mouse Hif1 $\alpha$  | CAT CTG ACC AAA<br>ACT CAC CAT G | ATC CAC CTC TTT TGG CAA<br>GCA    | AG GAC AAG TCA CCA CAG GAC<br>AGT ACA G Q   |
| Mouse Fumarase       | GAG AGC TGA TCT<br>TGC CTG AA    | ACA CTG AGT AGG GTT<br>CAC CT     | FCT GGC ATG ATG CTG CTC CCT<br>GGC Q        |
| Mouse PGC1 $\alpha$  | TGA TAA ACT GAG<br>CTA CCC TTG   | ACA CTG AGT CTC GAC<br>ACG G      | FCA TTG TTC GAT GTG TCG CCT<br>TCT TGC Q    |
| Mouse TGF $\beta$ 1  | TGC TTC AGC TCC<br>ACA GAG AA    | GTG GAT CCA CTT CCA<br>ACC CA     | FCC TTC CTA AAG TCA ATG TAC<br>AGC TGC CG Q |
| Mouse 18S            | AGA AAC GGC TAC<br>CAC ATC CA    | CTC GAA AGA GTC CTG<br>TAT TGT    | FAG GCA GCA GGC GCG CAA ATT<br>AC Q         |
| Mouse $\beta$ -Actin | CTG CCT GAC GGC<br>CAG GTC       | CAA GAA GGA AAGG CTG<br>GAA AAG A | FCA CTA TTG GCAACG AGC GGT<br>TCC G Q       |
| Human Hif1 $\alpha$  | CAT CTG ACC AAA<br>ACT CAT CAT G | ATC CAC CTC TTT TGG CAA<br>GCA    | FAG GAC AAG TCA CCA CAG GAC<br>AGT ACA G Q  |
| Human Fumarase       | GGA GAA TTG ATC<br>TTG CCT GAA   | ACACTG AGT AGG GTT CAC<br>CT      | FCC TGG CAT GAT ACT GCT TCC<br>TGG TTC Q    |
| Human TGF $\beta$ 1  | TGC TTC AGC TCC<br>ACG GAG AA    | GTG GAT CCA CTT CCA<br>GCC GA     | FCC TTG CGG AAG TCA ATG TAC<br>AGC TGC C Q  |
| Human 18S            | AGA AAC GGC TAC<br>CAC ATC CA    | CTC GAA AGA GTC CTG<br>TAT TGT    | FAG GCA GCA GGC GCG CAA ATT<br>AC Q         |
| Human $\beta$ -Actin | GGT CAT CAC CAT<br>TGG CAA TG    | TAG TTT CGT GGA TGC<br>CAC AG     | FCA GCC TTC CTT CCT GGG CAT<br>GGA Q        |
| Human CHOP           | CTG GAA ATG AAG<br>AGG AAG AAT C | TGG TTC TGG CTC CTC<br>CTC A      | FTC ACC ACT CTT GAC CCT GCT<br>TCT CTG Q    |
| Human GRP78          | GCT TCT GAT AAT CAA<br>CCA ACT G | TGT ACC CAG AAG ATG<br>ATT GTC    | FAG GTC TAT GAA GGT GAA AGA<br>CCC CTG Q    |
| Human $\alpha$ -SMA  | ACC CAG CAC CAT<br>GAA GAT CA    | GGA TGG AGC CAC CGA<br>TCC A      | FTT GCC CCT CCG GAG CGC AAA<br>TAC Q        |
| Human Fibronectin    | TGC ACA TGC TTT<br>GGA GGC CA    | AGT AGT GCC TTC GGG<br>ACT G      | FTG GCG CTG TGA CAA CTG CCG<br>CAG AQ       |
| Human Col 1A1        | AAC AGC CGC TTA<br>ACC TAC AG    | TCA ATC ACT GTC TTG<br>CCC CA     | FTC GAT GGC TGC ACG AGT CAC<br>ACC GQ       |
